# Supplementary material for: Pharmacokinetic Comparisons of Eight Active Components from Raw Farfarae Flos and Honey-Processed Farfarae Flos after Oral Administration in Rats by UHPLC-MS/MS Approaches
Source: Hindawi journal article supplement (doi:10.1155/2020/4091816), 2020-05-20
Supplement: f1 [file 4091816.f1.zip]

# Supplementary materials

**Table S1. Matrix effects and extraction recoveries for the analytes in rat plasma**

| Analytes               | Concentration<br>(ng/mL) | Matrix effect<br>(%, mean $\pm$ SD, n=6) | Recovery<br>(%, mean $\pm$ SD, n=6) |
|------------------------|--------------------------|------------------------------------------|-------------------------------------|
| Ferulic acid           | 100.00                   | 91.70 $\pm$ 3.26                         | 102.70 $\pm$ 4.97                   |
|                        | 200.00                   | 88.68 $\pm$ 2.80                         | 100.49 $\pm$ 2.41                   |
|                        | 500.00                   | 98.99 $\pm$ 5.31                         | 99.04 $\pm$ 4.10                    |
| Caffeic acid           | 380.00                   | 81.94 $\pm$ 3.24                         | 104.48 $\pm$ 5.80                   |
|                        | 3800.00                  | 85.03 $\pm$ 9.17                         | 81.54 $\pm$ 3.06                    |
|                        | 6000.00                  | 95.54 $\pm$ 6.83                         | 95.55 $\pm$ 7.83                    |
| Chlorogenic acid       | 3500.00                  | 91.35 $\pm$ 4.79                         | 100.07 $\pm$ 5.27                   |
|                        | 40400.00                 | 99.34 $\pm$ 7.87                         | 99.48 $\pm$ 3.17                    |
|                        | 110000.00                | 95.09 $\pm$ 4.47                         | 95.81 $\pm$ 2.29                    |
| Neochlorogenic acid    | 1000.00                  | 95.75 $\pm$ 4.72                         | 90.14 $\pm$ 4.73                    |
|                        | 15000.00                 | 99.46 $\pm$ 8.90                         | 99.29 $\pm$ 5.83                    |
|                        | 25000.00                 | 99.63 $\pm$ 3.71                         | 99.28 $\pm$ 3.32                    |
| Cryptochlorogenic acid | 2000.00                  | 97.98 $\pm$ 2.49                         | 97.94 $\pm$ 6.42                    |
|                        | 50000.00                 | 101.71 $\pm$ 3.20                        | 99.30 $\pm$ 7.60                    |
|                        | 100000                   | 100.32 $\pm$ 6.42                        | 97.65 $\pm$ 4.42                    |
| Isochlorogenic acid B  | 2000.00                  | 101.26 $\pm$ 6.32                        | 99.13 $\pm$ 7.56                    |
|                        | 80000.00                 | 99.45 $\pm$ 12.51                        | 99.83 $\pm$ 4.23                    |
|                        | 160000.00                | 99.88 $\pm$ 4.49                         | 103.60 $\pm$ 3.72                   |
| Isochlorogenic acid C  | 1500.00                  | 103.02 $\pm$ 5.12                        | 100.54 $\pm$ 3.38                   |
|                        | 7500.00                  | 99.03 $\pm$ 7.34                         | 98.80 $\pm$ 4.49                    |
|                        | 140000.00                | 100.43 $\pm$ 4.79                        | 90.31 $\pm$ 5.51                    |
| Rutin                  | 600.00                   | 99.57 $\pm$ 4.76                         | 102.72 $\pm$ 3.55                   |
|                        | 4000.00                  | 98.70 $\pm$ 3.57                         | 100.86 $\pm$ 6.63                   |
|                        | 8000.00                  | 99.11 $\pm$ 4.95                         | 101.40 $\pm$ 4.63                   |
| Chloramphenicol (IS)   | 100.00                   | 90.77 $\pm$ 6.66                         | 92.85 $\pm$ 4.67                    |

**Table S2. Stability of 8 analytes and IS in rat plasma (n=3)**

| Analytes               | Concentration<br>(ng/mL) | Short-term<br>(RE%) | Long-term<br>(RE%) | Freeze-thaw<br>(RE%) |
|------------------------|--------------------------|---------------------|--------------------|----------------------|
| Ferulic acid           | 100.00                   | 2.02                | 2.16               | 4.78                 |
|                        | 200.00                   | -0.51               | 3.51               | 1.65                 |
|                        | 500.00                   | 0.79                | 1.03               | 1.23                 |
| Caffeic acid           | 380.00                   | -3.53               | -3.82              | 4.73                 |
|                        | 3800.00                  | 1.00                | 1.23               | 4.70                 |
|                        | 6000.00                  | 1.03                | 1.97               | 1.01                 |
| Chlorogenic acid       | 3500.00                  | 0.12                | -2.47              | -1.34                |
|                        | 40400.00                 | 1.78                | -1.56              | -1.72                |
|                        | 110000.00                | -2.36               | -2.94              | -2.67                |
| Neochlorogenic acid    | 1000.00                  | 2.04                | 2.83               | 4.96                 |
|                        | 15000.00                 | 0.62                | -4.71              | 2.35                 |
|                        | 25000.00                 | 1.47                | 2.60               | -3.54                |
| Cryptochlorogenic acid | 2000.00                  | 2.36                | 1.02               | 1.73                 |
|                        | 50000.00                 | 1.54                | 3.73               | 1.67                 |
|                        | 100000                   | 2.25                | 2.06               | 3.86                 |
| Isochlorogenic acid B  | 2000.00                  | -0.21               | 2.84               | 2.90                 |
|                        | 80000.00                 | 1.10                | 2.06               | 1.59                 |
|                        | 160000.00                | 1.41                | -2.26              | -1.12                |
| Isochlorogenic acid C  | 1500.00                  | 1.31                | 4.77               | 2.78                 |
|                        | 7500.00                  | -0.29               | 1.42               | 3.65                 |
|                        | 140000.00                | 0.87                | 3.63               | 2.79                 |
| Rutin                  | 600.00                   | -0.53               | -4.09              | -2.83                |
|                        | 4000.00                  | 0.77                | 3.92               | -1.23                |
|                        | 8000.00                  | 1.23                | 3.30               | 2.31                 |
| Chloramphenicol (IS)   | 100                      | 0.74                | -2.22              | -4.77                |
