# Supplementary material for: Pharmacokinetic Comparisons of Eight Active Components from Raw Farfarae Flos and Honey-Processed Farfarae Flos after Oral Administration in Rats by UHPLC-MS/MS Approaches
Source: Hindawi journal article supplement (doi:10.1155/2020/4091816), 2020-05-20

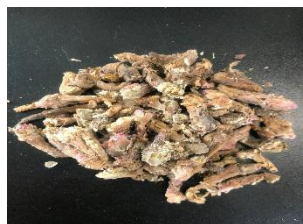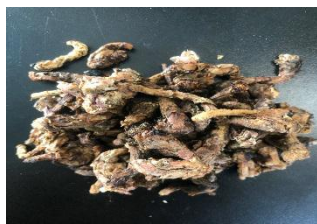

*The plasma of Oral administration  
of raw, honey-processed Farfarae  
flos*

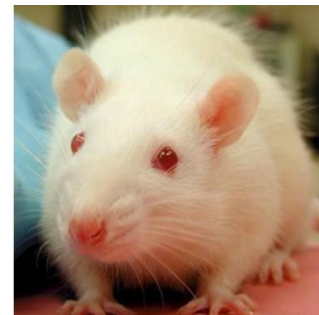

Raw Farfarae flos

Honey-processed Farfarae flos

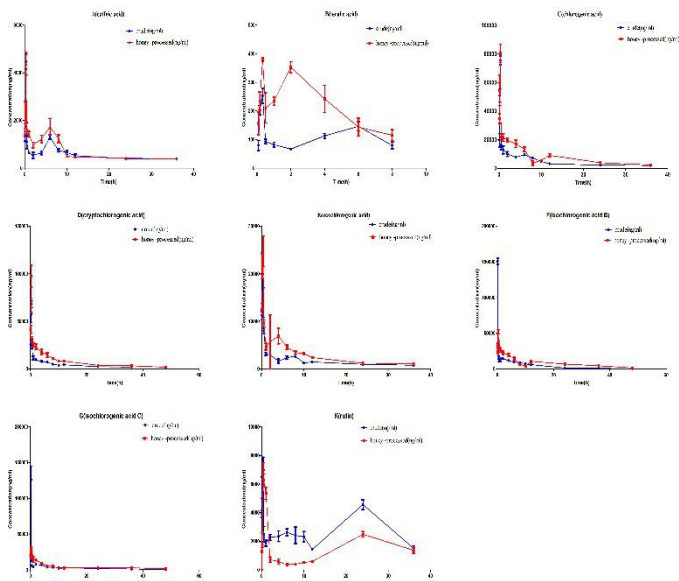

*The mean plasma drug concentration-time curves*

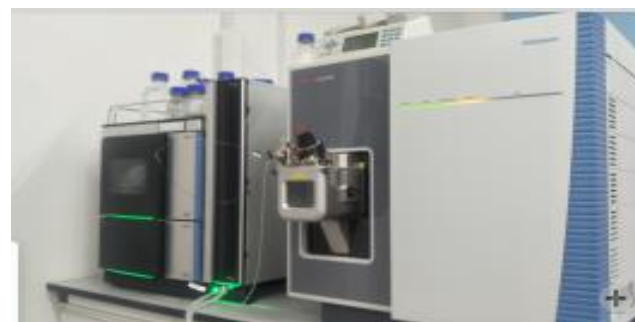

Supplement: f1 [file 4091816.f1.zip]
